# Supplementary material
Source: MDPI journal article supplement (https://www.mdpi.com/2073-4344/10/5/579)
Supplement: s1 [file s1]

Article—supporting information

# One-step synthesis of b-N-TiO<sub>2</sub>/C nanocomposites with high visible light photocatalytic activity to degrade *Microcystis aeruginosa*

Xu Zhang <sup>1,2</sup>, Min Cai <sup>1,2</sup>, Naxin Cui <sup>1,2</sup>, Guifa Chen <sup>1,2</sup>, Guoyan Zou <sup>1,2</sup> and Li Zhou <sup>1,2,\*</sup>

<sup>1</sup> Institute of Eco-environmental and Plant Protection, Shanghai Academy of Agricultural Science, Shanghai, 201403, China; zouguoyan@263.net

<sup>2</sup> Shanghai Engineering Research Center of Low-carbon Agriculture, Shanghai, 201403, China; zouguoyan@263.net

\* Correspondence: joly.zhouli@gmail.com; Tel.: +86-18817365817 (L.Z.)

Received: date; Accepted: date; Published: date

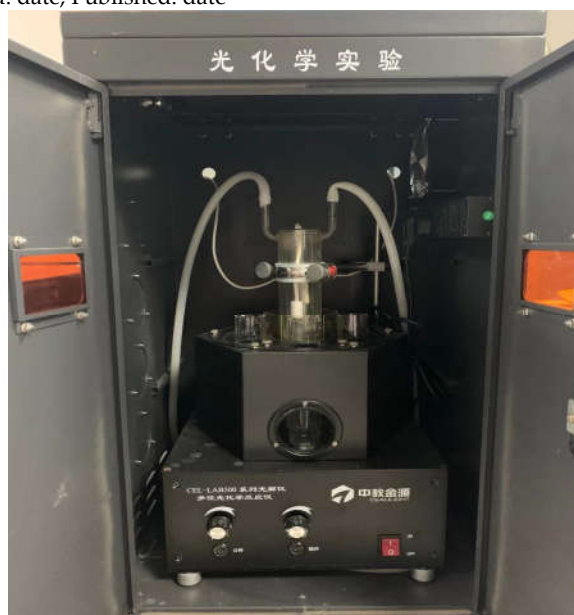

**Figure S1.** A multi-position photochemical reactor with a xenon lamp, UV-cutoff filters, cooling system, and magnetic stirrers.

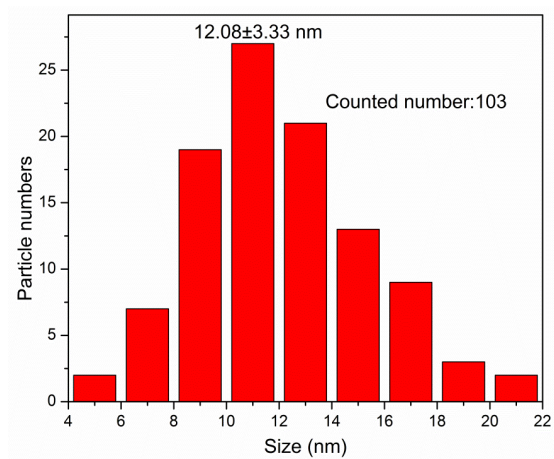

Figure S2. Particle size distribution of 0.6N

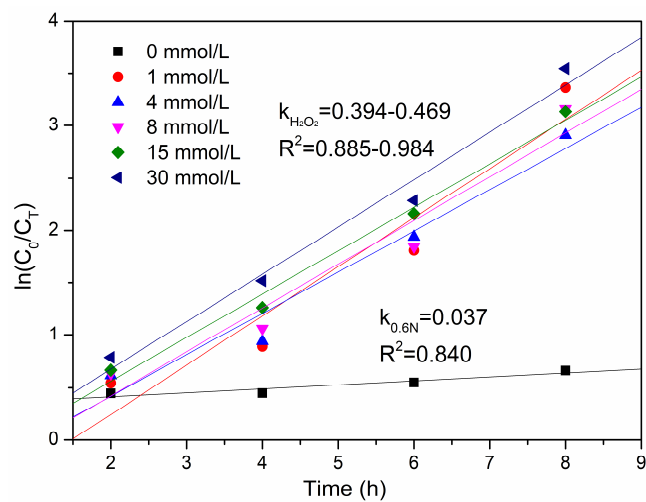

Figure S3. Variations of  $\ln(C_0/C_T)$  versus visible light irradiation time with different concentration of  $H_2O_2$ .

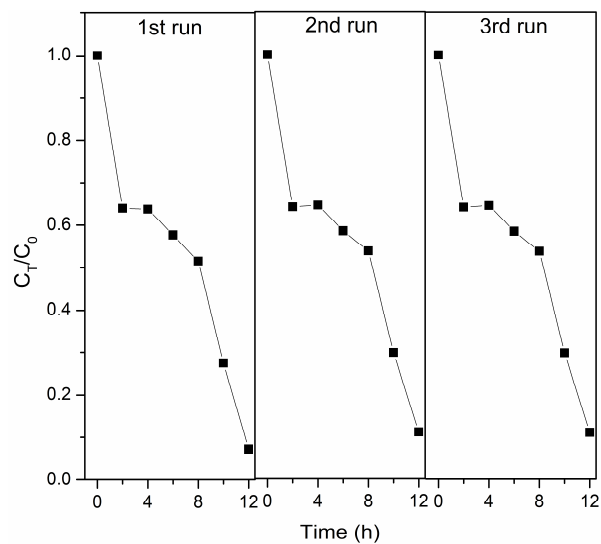

**Figure S4.** Photocatalytic degradation of chlorophyll-a in algae cells for three times by 0.6N.

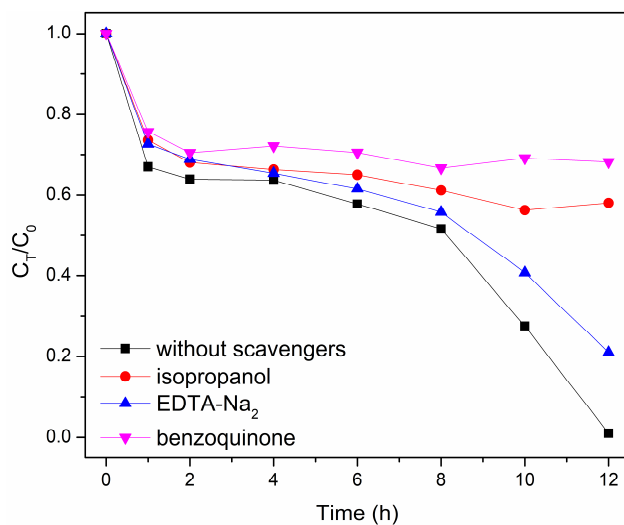

**Figure S5.** Trapping experiments of reactive oxygen species for the sample 0.6N in the process to degrade chlorophyll-a in algae cells.

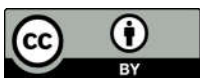

© 2020 by the authors. Submitted for possible open access publication under the terms and conditions of the Creative Commons Attribution (CC BY) license (<http://creativecommons.org/licenses/by/4.0/>).
